# Supplementary material for: The Coordinated KNR6–AGAP–ARF1 Complex Modulates Vegetative and Reproductive Traits by Participating in Vesicle Trafficking in Maize
Source: Cells. 2021 Sep 30;10(10):2601. doi: 10.3390/cells10102601 (PMC8533723; doi:10.3390/cells10102601)
Supplement: Supplementary file 1 [file cells-10-02601-s001.zip › Table S1.xlsx]

## Sheet: Sheet1
Primer name	Primer sequence (5')	Primer sequence (3')	Purpose
KNR6-crispr	ATGAGTTGTTTTTCTCACCTTTTCA	AAGAAGTATATTGCTCGCCTTGAT	Crispr
AGAP-crispr	ATGGAACGACAGGGGATGGAGGGCA	TGGTCATTTATGTACCAAAGCAGT
AGAP-NLuc	CGAGCTCGGTACCCGGGATCCATGGAACGACAGGGGATGGAGGGCA	CGCGTACGAGATCTGGTCGACCTGGCTGAGCGGCACACACTCG	LCI-assay
AGAP-CLuc	TACGCGTCCCGGGGCGGTACCATGGAACGACAGGGGATGGAGGGCA	ACGAAAGCTCTGCAGGTCGACCTACTGGCTGAGCGGCACACACTCG
043113-Nluc	CGAGCTCGGTACCCGGGATCCATGGGGCTCTCCTTTGGGAAGCTGT	CGCGTACGAGATCTGGTCGACCTTCAACATCTTGTTGGCGATG
043113-Cluc	TACGCGTCCCGGGGCGGTACCATGGGGCTCTCCTTTGGGAAGCTGT	ACGAAAGCTCTGCAGGTCGACTCACTTCAACATCTTGTTGGCGATG
008295-Nluc	CGAGCTCGGTACCCGGGATCCATGGGGCTCACCTTCACGAAGCTCT	CGCGTACGAGATCTGGTCGACGGCCTTGTTTGCAATGTTGTTG
008295-Cluc	TACGCGTCCCGGGGCGGTACCATGGGGCTCACCTTCACGAAGCTCT	ACGAAAGCTCTGCAGGTCGACTCAGGCCTTGTTTGCAATGTTGTTG
005231-Nluc	CGAGCTCGGTACCCGGGATCCATGGGGCTCGCGTTCGGGAAGCTCT	CGCGTACGAGATCTGGTCGACAGCAAGCCATATGTATACCTTG
005231-Cluc	TACGCGTCCCGGGGCGGTACCATGGGGCTCGCGTTCGGGAAGCTCT	ACGAAAGCTCTGCAGGTCGACTCAAGCAAGCCATATGTATACCTTG
019191-Nluc	CGAGCTCGGTACCCGGGATCCATGGGGCTCGCGTTCGGGAAGCTCT	CGCGTACGAGATCTGGTCGACGTCAGTTCGCGGTTGACATTCA
019191-Cluc	TACGCGTCCCGGGGCGGTACCATGGGGCTCGCGTTCGGGAAGCTCT	ACGAAAGCTCTGCAGGTCGACCTAGTCAGTTCGCGGTTGACATTCA
013007-Nluc	CGAGCTCGGTACCCGGGATCCATGCGTGGGATGGATCGGCGTCCTG	CGCGTACGAGATCTGGTCGACGGACTTGGTTGCAATGTTGCTG
013007-Cluc	TACGCGTCCCGGGGCGGTACCATGCGTGGGATGGATCGGCGTCCTG	ACGAAAGCTCTGCAGGTCGACTTAGGACTTGGTTGCAATGTTGCTG
p1304-AGAP	CATGGTAGATCTGACTAGTATGGAACGACAGGGGATGGAGGGCA	CCCTTGCTCACCATACTAGTCTGGCTGAGCGGCACACACTCGATC	subcelluar localization
p1304-ARF1.1	CATGGTAGATCTGACTAGTATGGGGCTCTCCTTTGGGAAGCTGT	CCCTTGCTCACCATACTAGTCTTCAACATCTTGTTGGCGATG
p1304-ARF1.2	CATGGTAGATCTGACTAGTATGGGGCTCACCTTCACGAAGCTCT	CCCTTGCTCACCATACTAGTGGCCTTGTTTGCAATGTTGTTG
pm999-ST	AGCAGATCTATCGATTCTAGAATGTCATCATCATCATCAGT	TCCTTTGCCCATGGCTCTAGAAGAAGAAAATTTAAGACCAG
AGAP-pBridge	GCCGCATTAGCCCGAAGATCTATGGAACGACAGGGGATGGA	TCAGCCCGAAGATCTCTGGCTGAGCGGCACACACT	yeast three hybrid
KNR6-pBridge	TTGACTGTATCGCCGGAATTCATGAGTTGTTTTTCTCACCT	TCGACGGATCCCCGGGAATTCGTCGCGCTCCGATATCTCGG
ARF1.1-AD	GCCATGGAGGCCAGTGAATTCATGGGGCTCTCCTTTGGGAA	ATGCCCACCCGGGTGCTTCAACATCTTGTTGGCGA
ARF1.2-AD	GCCATGGAGGCCAGTGAATTCATGGGGCTCACCTTCACGAA	ATGCCCACCCGGGTGGGCCTTGTTTGCAATGTTGT
